# Supplementary material for: Aster-B–dependent estradiol synthesis protects female mice from diet-induced obesity
Source: PubMed Central journal article supplement (PMC10866650; doi:10.1172/jci173002), 2024-01-04
Supplement: jci-134-173002-s111.pdf [file jci-134-173002-s111.pdf]

1 **Supplemental Figure 1.** (A and B) Expression levels of the indicated genes in the ovaries (A)  
2 and liver (B) of female WT and Aster-B KO mice. n = 11/13 for ovary; n = 10/10 for liver. (C)  
3 Representative images of the female mice on chow diet feeding. (D) Body weight of female WT  
4 and Aster-B-KO mice on chow diet at age of 12 weeks, 20 weeks and 30 weeks; n = 20/31 for 12  
5 weeks; n = 15/16 for 20 weeks; n = 13/13 for 30 weeks. (E) Body weight of male WT and  
6 Aster-B-KO mice on chow diet at age of 12 weeks, 20 weeks and 30 weeks; n = 16/25 for 12  
7 weeks; n = 11/13 for 20 weeks; n = 16/21 for 30 weeks. All data are presented as mean  $\pm$  s.e.m.  
8 P values were determined by two-sided Student's t-test (A, B, D and E). \*\*\*\*\*P < 0.00001.

9 **Supplemental Figure 2.** (A) Relative expression of *Gramd1b* in different tissues from the  
10 mouse. n=5. (B and C) cDNA sequence of *Gramd1b1*(B) and *Gramd1b2* (C). (D) ClustalW  
11 alignment of N-terminal region from Aster-B1 and B2. The rest of the proteins share the same  
12 amino acid sequence. The position of the predicted helices in Aster-B1 and B2 are highlighted in  
13 cyan and magenta, respectively. (E) Immunoblot analysis of Aster-B1 and -B2 after vehicle or  
14 indicated cholesterol treatment for 4 hours.

15 **Supplemental Figure 3.** (A and B) Aster-B2 (A) and Aster-B2 truncated  $\alpha$ -Helix (B) in HeLa  
16 cells imaged by confocal microscopy in 10% FBS (left), 1% LPDS (middle) or following  
17 cholesterol loading for 1 h (right). Green, HA tagged Aster-B. Blue, DIPA. (C) Amino acid  
18 composition of Aster-B1 and B2 N-terminal region. Non-polar residues in Aster-B1 are  
19 highlighted in yellow and positively charged residues are highlighted in blue in Aster-B2. (D)  
20 Aster-B2, Mito-tracker and KDEL-BFP were imaged by confocal microscopy in 10% FBS (left),  
21 1% LPDS (middle), or following 100  $\mu$ M cholesterol: methyl- $\beta$ -cyclo- dextrin complexes  
22 loading for 1 h (right).

1 **Supplemental Figure 4.** (A) Average number of birth pups per female in 10 weeks; n = 6/6. (B)  
2 Fertility rate analysis for female WT and Aster-B knock-out mice in 10 weeks. All data are  
3 presented as mean  $\pm$  s.e.m. P values were determined by two-sided Student's t-test (A).

4 **Supplemental Figure 5.** (A and B) Total liver cholesterol (A) and triglyceride (B) in male WT  
5 and Aster-B-KO mice after 10 weeks of WD feeding. n=10/10. (C and D) Plasma total  
6 cholesterol (C) and triglyceride (D) in male WT and Aster-B-KO mice after 10 weeks of WD  
7 feeding; n = 18/11 for cholesterol; n=19/11 for triglyceride. All data are presented as mean  $\pm$   
8 s.e.m. P values were determined by two-sided Student's t-test (A, B, C and D).

9 **Supplemental Figure 6.** (A) The cumulative food consumed per mouse from male WT versus  
10 Aster-B-KO mice fed with WD for 4 weeks of study. n=6/4. (B) The body weight measured from  
11 (A); n=5/4. (C) The Respiratory Exchange Ratio (RER) data from Figure 5C and 5D. n= 10/12.  
12 All data are presented as mean  $\pm$  s.e.m. P values were determined by two-way ANOVA (A, B) or  
13 two-sided Student's t-test (C).

14 **Supplemental Figure 7.** (A) Representative image of mice with or without ovariectomy. (B)  
15 Normalized body weight gain from Figure 1A, and the ovariectomized WT or Aster-B-KO mice  
16 are from Figure 6A. n = 10/8/11/15. (C) Normalized body weight gain from Figure 1A and E2  
17 treated Aster-B-KO mice from Figure 7A. The WT group combined the data from Figure 1A and  
18 7A. n = 21/11/15.

19

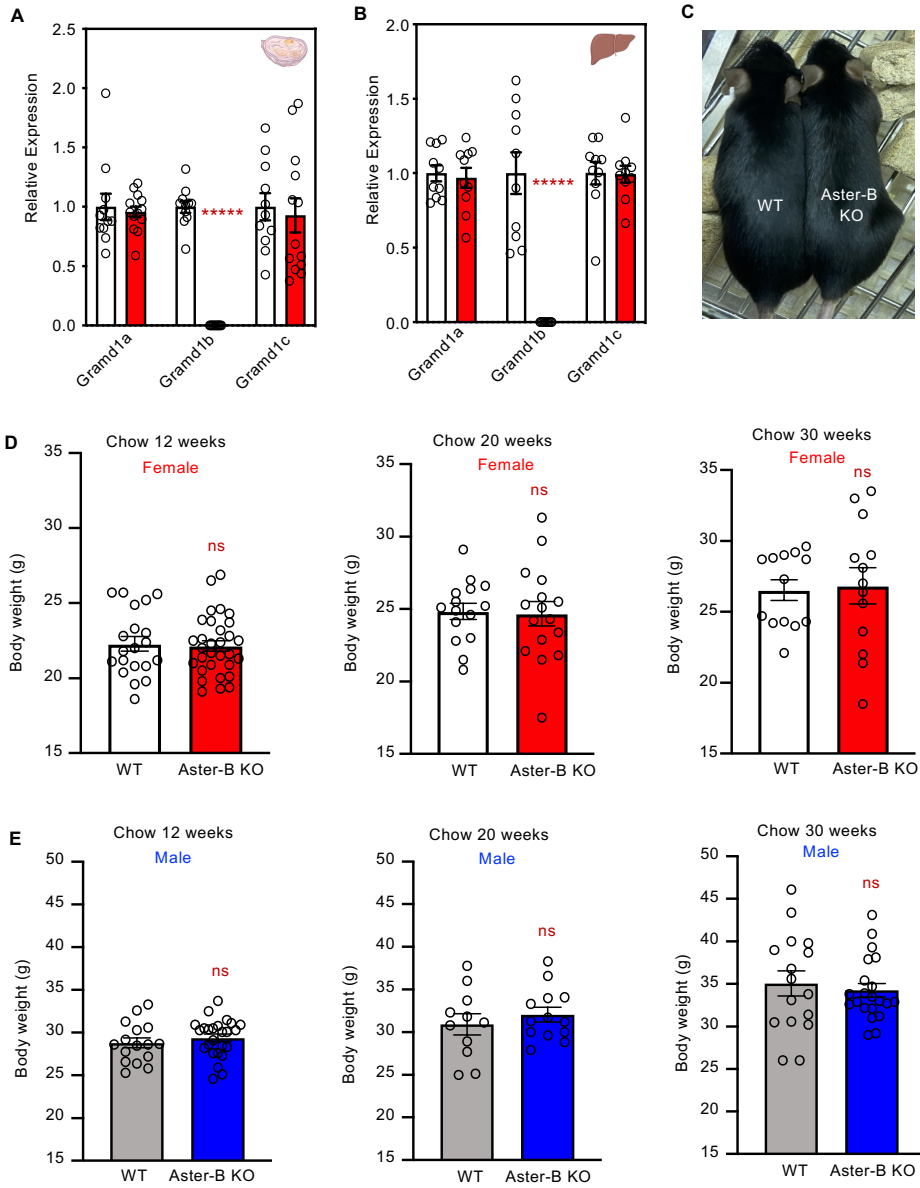



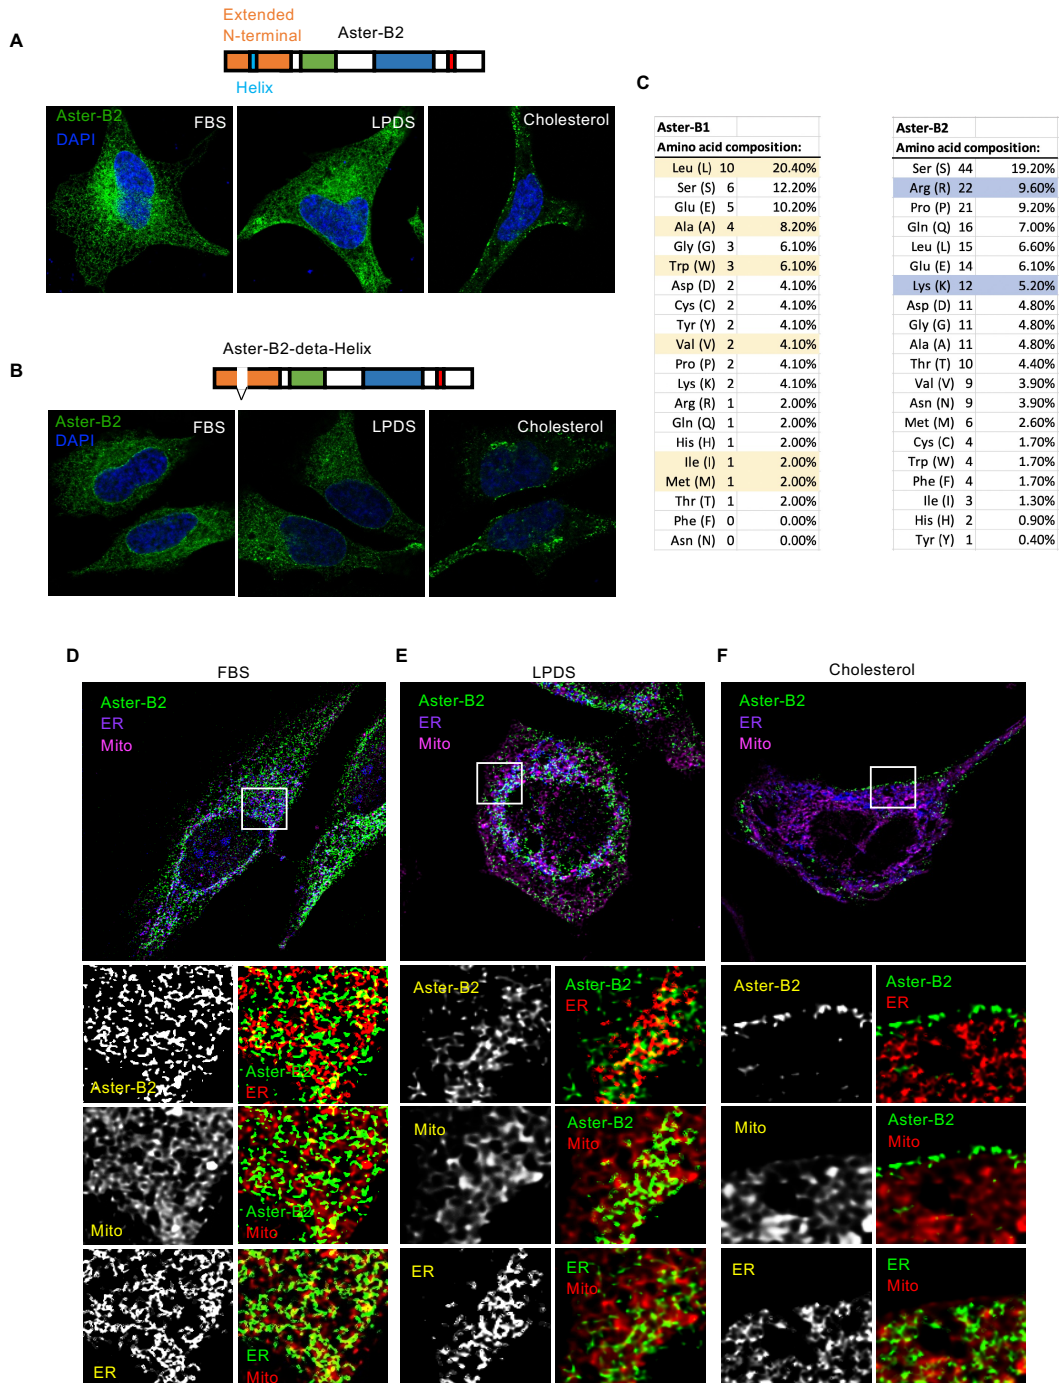

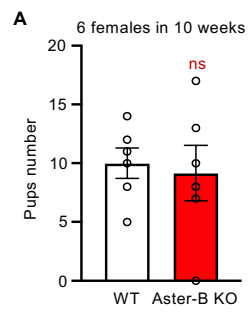

**B**

| M x F   | Total Pups NO. | Pups/mouse | Total Litters NO. | Litters/mouse |
|---------|----------------|------------|-------------------|---------------|
| WT x WT | 60             | 10         | 11                | 1.83          |
| WT x KO | 55             | 9.17       | 8                 | 1.33          |

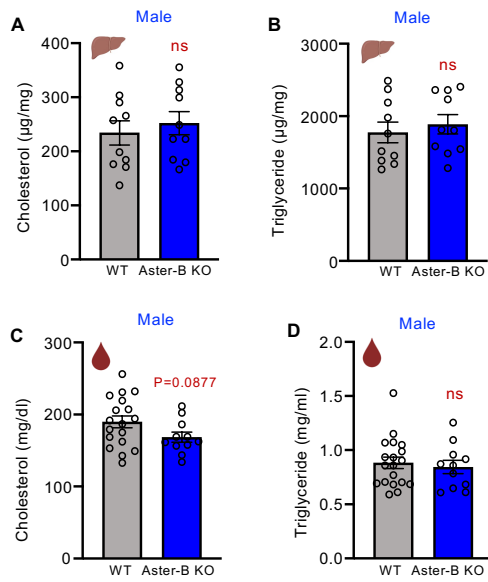

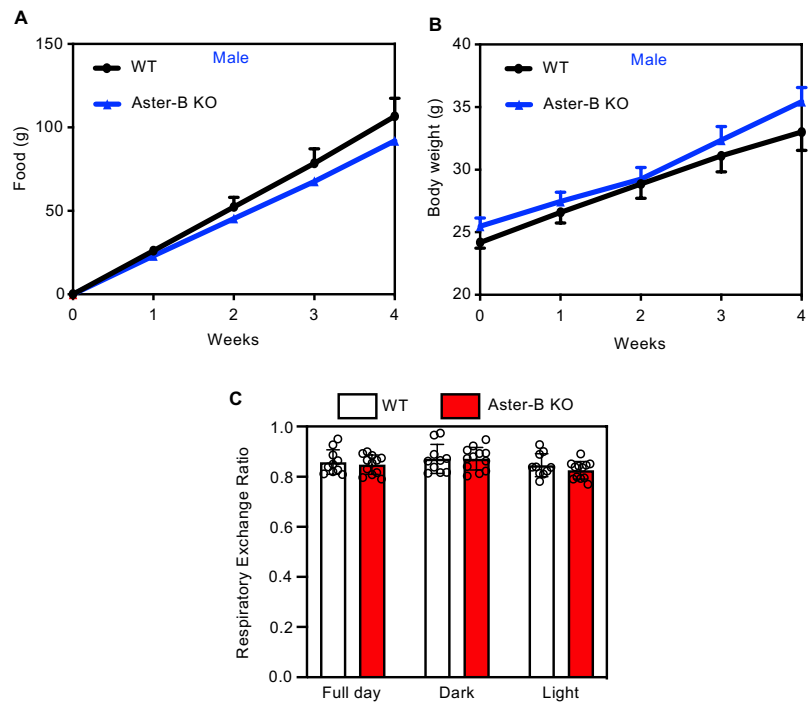



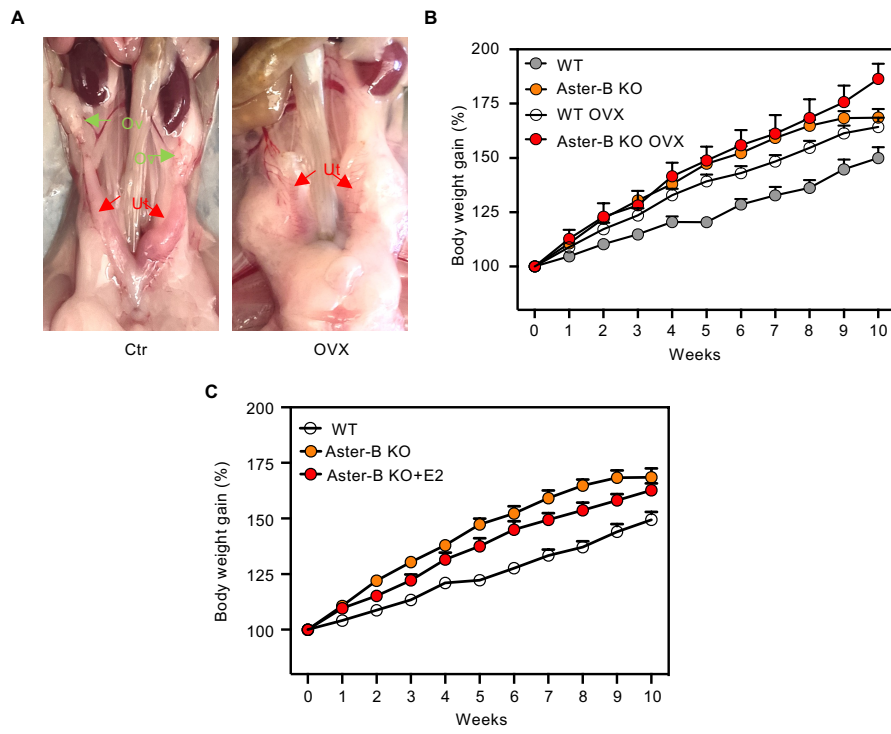

**Supplemental Table 1. Q-PCR primer sequences**

| <b>Gene</b> | <b>Forward</b>            | <b>Reverse</b>              |
|-------------|---------------------------|-----------------------------|
| m Gramd1A   | CAGCAGATGCTCTTCTCGGA      | TCTGAGGATACACGAAGCCG        |
| m Gramd1b   | TCCAATGCCATCCAAGTC        | ACAAAGTGCCAGAGCTCC          |
| m Gramd1c   | CCGTGTCTTTCACATCAGTGC     | ACTTCCCAGTTAGCGGGTTG        |
| m Srebp2    | ACCTAGACCTCGCCAAAGGT      | GCACGGATAAGCAGGTTTGT        |
| m Hmgcr     | CTTGTGGAATGCCTTGTGATT     | AGCCGAAGCAGCACATGAT         |
| m Hmgcs     | GCC GTG AAC TGG GTC GAA   | GCA TAT ATA GCA ATG TCT CCT |
| m Ldlr      | AGGCTGTGGGCTCCATAGG       | TGC GGT CCA GGG TCA TCT     |
| m Sqle      | GCCTCTCAGAATGGTCGTCT      | CGCATGTCCCAGAATAAGGA        |
| m Gdf9      | GTCACCTCTACAATACCGTCCG    | TAAACAGCAGGTCCACCATCGG      |
| m Bmp15     | GATTGGAGCGAAAATGGTGAGGC   | GCTACCTGGTTTGATGCTAGAGG     |
| m Caspase-3 | GGAGTCTGACTGGAAAGCCGAA    | CTTCTGGCAAGCCATCTCCTCA      |
| m Bcl2      | CCTGTGGATGACTGAGTACCTG    | AGCCAGGAGAAATCAAACAGAG      |
| m Bcl3      | AGCAGTCGTCTCAGCTCCAATG    | AGGCAGGTGTAGATGTTGTGGG      |
| m p21       | TCGCTGTCTTGCCTCTGGTGT     | CCAATCTGCGCTTGGAGTGATAG     |
| m p53       | CTGGTTAGTCCTGAGACAGAGG    | AGATGCAGCCAAACACAGGCAC      |
| m Bax       | AGGATGCGTCCACCAAGAAGCT    | TCCGTGTCCACGTCAGCAATCA      |
| m Esr1      | GCCAGAATGGCCGAGAGAG       | CCCCATAATGGTAGCCAGAGG       |
| m Pgr       | CTACTCGCTGTGCCTTACCATG    | CTGGCTTTGACTCCTCAGTCCT      |
| m Pck1      | GGCGATGACATTGCCTGGATGA    | TGTCTTCACTGAGGTGCCAGGA      |
| m Gdf15     | AGCCGAGAGGACTCGAACTCAG    | GGTTGACGCGGAGTAGCAGCT       |
| m Polg1     | TAGCTGGCTGGTCCAAGAGT      | CGACGTGGAGGTCTGCTT          |
| m Nrf1      | GACAAGATCATCAACCTGCCTGTAG | GCTCACTTCTCCGGTCCTTTG       |
| m Fasn      | AAGTCCCAGAAATCGCCTATG     | GGTATGGTTTTACGACTGGAG       |
| m Acc       | GTTCTGTTGGACAACGCCTTCAC   | GGAGTCACAGAAGCAGCCCATT      |
| m Scd1      | TTCTTGCGATACACTCTGGTGC    | CGGGATTGAATGTTCTTGTTCGT     |
| m Elovl6    | CGGCATCTGATGAACAAGCGAG    | GTACAGCATGTAAGCACCAGTTC     |
| m Pgc1a     | TATGGAGTGACATAGAGTGTGCT   | GTCGCTACACCACTTCAATCC       |
| m Ucp1      | ACTGCCACACCTCCAGTCATT     | CTTTGCCCTCACTCAGGATTGG      |
| m Adrb3     | AGAAACGGCTCTCTGGCTTTG     | TGGTTATGGTCTGTAGTCTCGG      |
| m Cox8b     | GAACCATGAAGCCAACGACT      | GCGAAGTTCACAGTGGTTCC        |
| m Cox4i1    | ATTGGCAAGAGAGCCATTTCTAC   | TGGGGAAAGCATAGTCTTCACT      |
| m Cox5b     | GCTGCATCTGTGAAGAGGACAAC   | CAGCTTGTAATGGGTTCCACAGT     |
| m Cox7a1    | CAGCGTCATGGTCAGTCTGT      | AGAAAACCGTGTGGCAGAGA        |
