# Supplementary material for: Aster-B–dependent estradiol synthesis protects female mice from diet-induced obesity
Source: PubMed Central journal article supplement (PMC10866650; doi:10.1172/jci173002), 2024-01-04

Full unedited gel for Fig.S2E

HA-Aster-B1

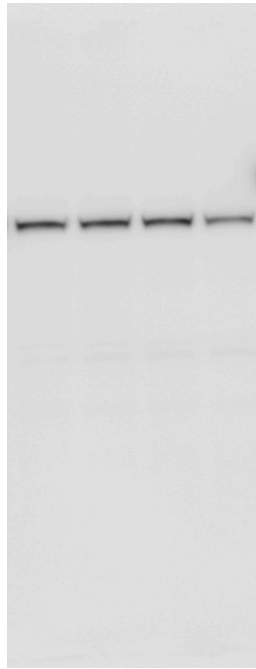

Actin for  
HA-Aster-B1

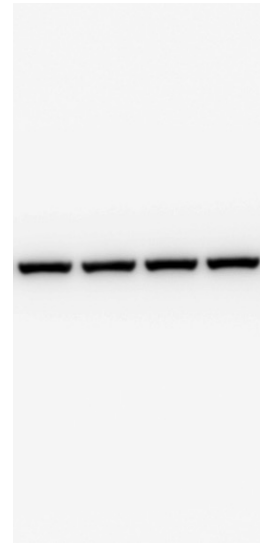

HA-Aster-B2

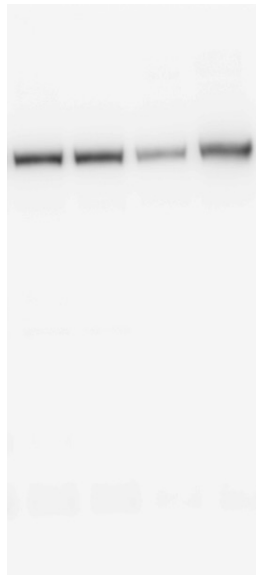

Actin for  
HA-Aster-B2

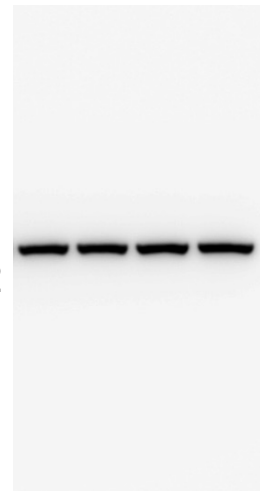

GFP

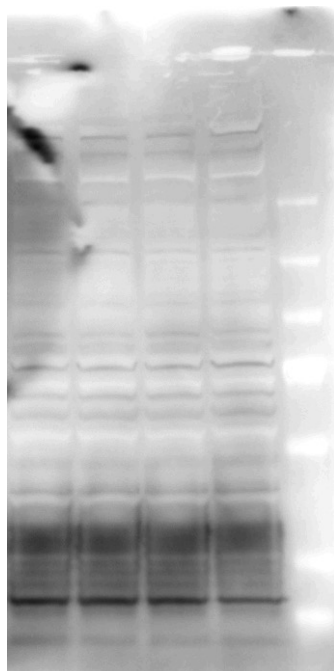

Actin for  
GFP

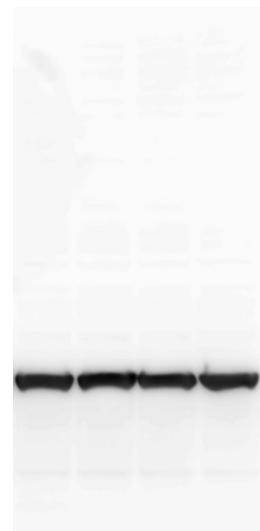

Supplement: jci-134-173002-s112.pdf [file jci-134-173002-s112.pdf]
